# Supplementary material for: The Discrepancy between Subjective and Objective Evaluations of Cognitive and Functional Ability among People with Schizophrenia: A Systematic Review
Source: MDPI journal article supplement (doi:10.3390/bs14010030), 2023-12-30

**Table S1.** Results of ROBUST Assessment.

| <i>Article</i>                 | <i>Sampling<br/>Frame</i> | <i>Participant<br/>Recruitment</i> | <i>Exclusion<br/>Rate</i> | <i>Sample Size</i> | <i>Sample<br/>Characterist<br/>ics</i> | <i>Measuremen<br/>t Validity</i> | <i>Setting</i> | <i>Data<br/>Managemen<br/>t</i> | <i>Total</i> |
|--------------------------------|---------------------------|------------------------------------|---------------------------|--------------------|----------------------------------------|----------------------------------|----------------|---------------------------------|--------------|
| Zanello & Huguelet (2001) [14] | 1                         | 0                                  | 0                         | 0                  | 1                                      | 0                                | 1              | 0                               | 3            |
| Bowie et al. (2007) [26]       | 0                         | 0                                  | 0                         | 0                  | 1                                      | 0                                | 1              | 0                               | 2            |
| Medalia et al. (2008) [15]     | 1                         | 0                                  | 1                         | 0                  | 1                                      | 0                                | 1              | 0                               | 4            |
| Donohoe et al. (2009) [16]     | 1                         | 0                                  | 0                         | 0                  | 1                                      | 0                                | 1              | 0                               | 3            |
| Lecardeur et al. (2009) [17]   | 1                         | 0                                  | 0                         | 1                  | 1                                      | 0                                | 1              | 0                               | 4            |
| Johnson et al. (2011) [18]     | 1                         | 0                                  | 0                         | 1                  | 1                                      | 0                                | 1              | 0                               | 4            |
| Sabbag et al. (2011) [27]      | 1                         | 0                                  | 0                         | 1                  | 1                                      | 0                                | 1              | 0                               | 4            |
| Sabbag et al. (2012) [28]      | 1                         | 0                                  | 1                         | 1                  | 0                                      | 0                                | 1              | 1                               | 5            |
| Saperstein et al. (2012) [19]  | 1                         | 0                                  | 1                         | 0                  | 1                                      | 1                                | 1              | 0                               | 5            |
| Gould et al. (2013) [29]       | 1                         | 0                                  | 0                         | 1                  | 1                                      | 0                                | 1              | 0                               | 4            |
| Harvey et al. (2013) [30]      | 1                         | 0                                  | 0                         | 1                  | 1                                      | 0                                | 1              | 0                               | 4            |
| Sellwood et al. (2013) [20]    | 1                         | 0                                  | 0                         | 1                  | 1                                      | 1                                | 1              | 0                               | 5            |
| Durand et al. (2014) [38]      | 1                         | 0                                  | 1                         | 1                  | 1                                      | 0                                | 1              | 0                               | 5            |
| Chang et al. (2015) [21]       | 1                         | 0                                  | 0                         | 1                  | 1                                      | 1                                | 1              | 0                               | 5            |
| Gould et al. (2015) [2]        | 1                         | 0                                  | 0                         | 1                  | 1                                      | 0                                | 1              | 0                               | 4            |
| Prouteau et al. (2015) [22]    | 1                         | 0                                  | 0                         | 0                  | 1                                      | 0                                | 1              | 0                               | 3            |

|                               |     |    |     |     |     |     |      |     |            |
|-------------------------------|-----|----|-----|-----|-----|-----|------|-----|------------|
| Harvey et al.<br>(2017) [31]  | 1   | 0  | 0   | 1   | 1   | 0   | 1    | 1   | 5          |
| Olsson et al.<br>(2019) [32]  | 1   | 0  | 0   | 1   | 1   | 0   | 1    | 0   | 4          |
| Harvey et al.<br>(2019) [33]  | 1   | 0  | 0   | 1   | 1   | 0   | 1    | 0   | 4          |
| Durand et al.<br>(2021) [34]  | 1   | 0  | 0   | 1   | 1   | 1   | 1    | 0   | 5          |
| Haugen et al.<br>(2021) [24]  | 1   | 0  | 0   | 0   | 1   | 1   | 1    | 1   | 5          |
| Rocca et al.<br>(2021) [35]   | 1   | 0  | 1   | 1   | 1   | 0   | 1    | 0   | 5          |
| Tercero et al.<br>(2021) [23] | 1   | 0  | 0   | 0   | 1   | 0   | 1    | 0   | 3          |
| Jongs et al. (2022)<br>[36]   | 1   | 0  | 1   | 0   | 1   | 0   | 1    | 0   | 4          |
| Morgan et al.<br>(2022) [25]  | 1   | 0  | 1   | 1   | 1   | 0   | 1    | 1   | 6          |
| Okada (2022)<br>[37]          | 1   | 0  | 0   | 1   | 0   | 0   | 1    | 0   | 3          |
| Summary                       | 96% | 0% | 27% | 65% | 92% | 19% | 100% | 15% | 4 (median) |

1. Sampling frame: Is the sampling frame largely representative of the studied population?

Yes (1) = they are identical, or the sampling frame is representative to a great extent

No (0) = the sampling frame represents a much more specific group than the studied population or not reported

2. Participant recruitment: Were appropriate methods utilized for participant recruitment?

Yes (1) = relatively low sampling bias (e.g., random selection or randomly addressing participants)

No (0) = high potential for sampling bias (e.g., convenience sample) or not reported

3. Exclusion rate: Is the exclusion rate of participants acceptable?

Yes (1) = below 20% of participants were excluded

No (0) = more than 20% excluded or not reported

4. Sample size: Is the final sample size sufficient for the research design?

Yes (1) = equal to or above  $N = 100$

No (0) = less than the chosen criterion or not reported

5. Sample characteristics: Are the basic demographic characteristics of the sample reported?

Yes (1) = both age and gender are reported

No (0) = one or both not reported

6. Measurement validity: Do the relevant measures have adequate reliability?

Yes (1) = all measures have acceptable reliability (e.g.,  $\alpha > 0.7$  for a scale with 7 or more items)

No (0) = reliability of one measure or more is less than the chosen criterion or not reported

7. Setting: Were the procedures included in the study conducted in a controlled setting?

Yes (1) = controlled environment (e.g., laboratory or university settings)

No (0) = uncontrolled environment (e.g., online) or not reported

8. Data management: Are data cleaning and management procedures reported and/or acceptable?

Yes (1) = Reporting of either missing data, outliers, or invalid responses

No (0) = all unreported or unusual procedures utilized

**Figure S1.** PRISMA Flow Chart.

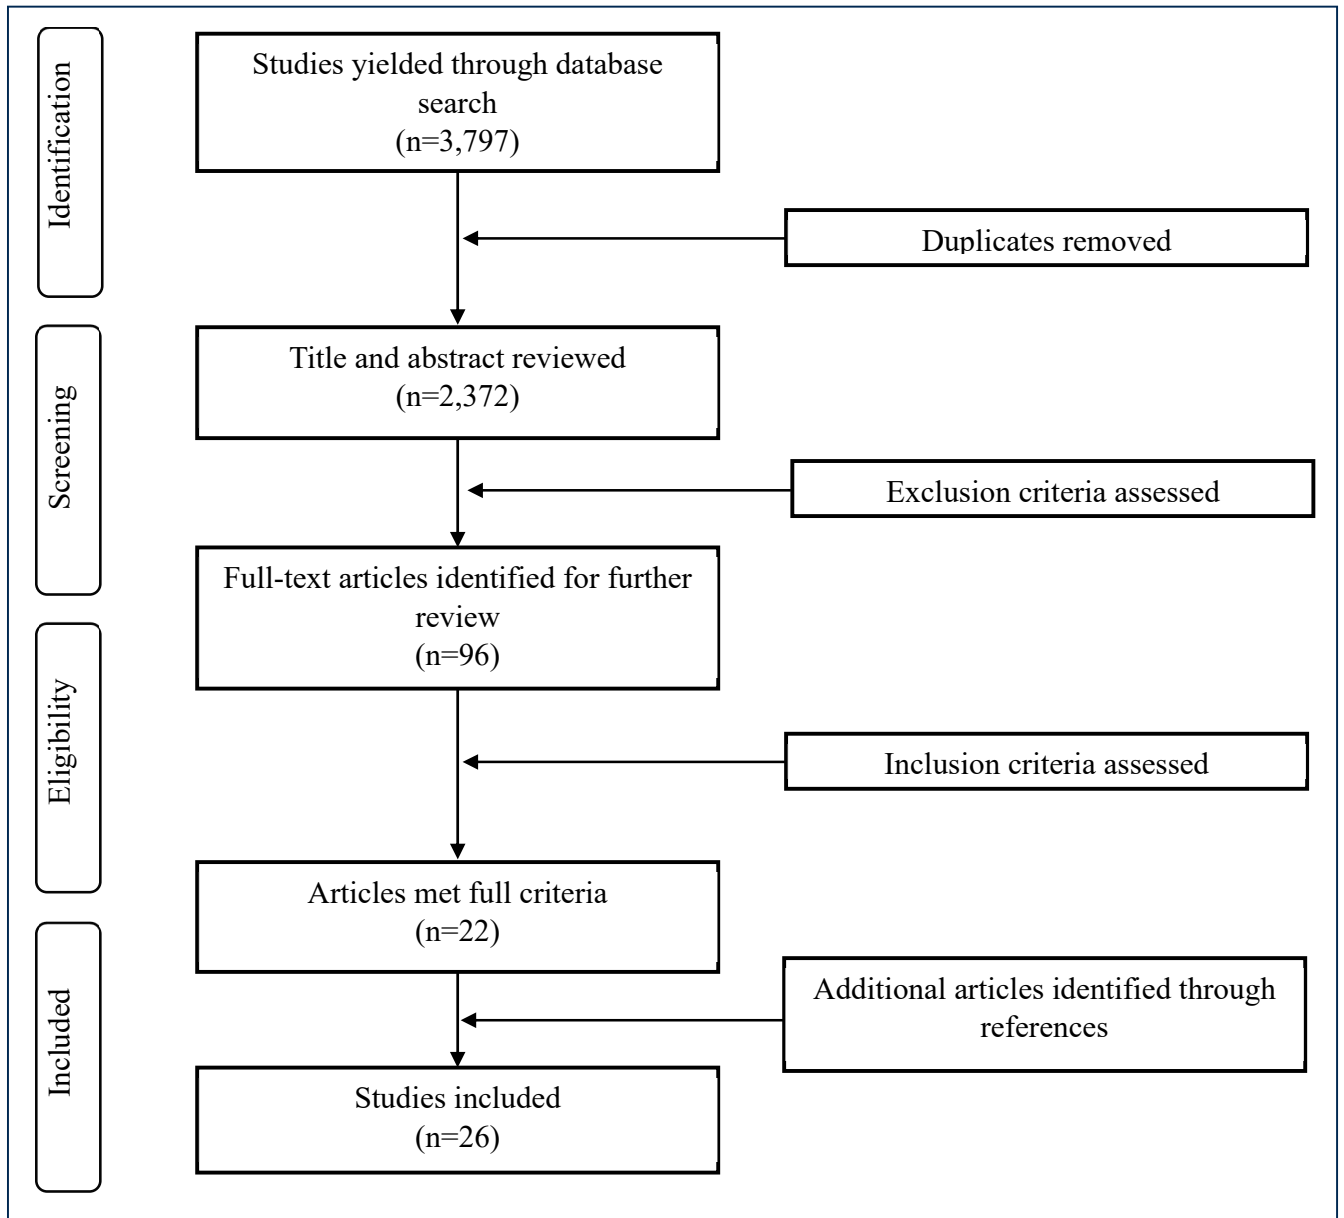

Supplement: s1 [file s1]
